# Supplementary material for: Low-dose benznidazole treatment results in parasite clearance and attenuates heart inflammatory reaction in an experimental model of infection with a highly virulent Trypanosoma cruzi strain
Source: PubMed Central journal article supplement — Int J Parasitol Drugs Drug Resist. 2015 Dec 12;6(1):12–22. doi: 10.1016/j.ijpddr.2015.12.001 (PMC4706620; doi:10.1016/j.ijpddr.2015.12.001), 2015-12-12
Supplement: mmc1.pdf [file mmc1.pdf]

# Supplementary Material

## Table 1. Primer sequences

|               | <b>Forward (5' - 3')</b> | <b>Reverse (5' - 3')</b>     |
|---------------|--------------------------|------------------------------|
| NOS2          | CACAGCAATATAGGCTCATCCA   | GGATTCAGCCTCATGGTAAAC        |
| IL-6          | TGATGCACTTGCAGAAAACAA    | GGTCTTGGTCCTTAGCCACTC        |
| IL-1 $\beta$  | TTGACAGTGATGAGAATGACC    | CAAAGATGAAGGAAAAGAAGG        |
| 18S           | AACACGGGAAACCTCACCC      | CCACCAACTAAGAACGGCCA         |
| TCZ           | TCCCTCTCATCAGTTCTATGGCCC | CAGCAAGCATCTATGZCACTTAGACCCC |
| TNF- $\alpha$ | GCTCTTGCCACAMGGGTGC      | CCAAGCAGCGGATAGTTCAG         |
